# Supplementary material for: Vitamin A Deficiency Exacerbates Gut Microbiota Dysbiosis and Cognitive Deficits in Amyloid Precursor Protein/Presenilin 1 Transgenic Mice
Source: Front Aging Neurosci. 2021 Nov 1;13:753351. doi: 10.3389/fnagi.2021.753351 (PMC8591312; doi:10.3389/fnagi.2021.753351)
Supplement: Supplementary file 2 [file Table_2.XLSX]

## Sheet: stability.opti_mcc.0.03.subsamp
Metastats analysis
Genus name	Mean(VAN)	Variance(VAN)	Stderr(VAN)	Mean(VAD)	Variance(VAD)	Stderr(VAD)	P value
g__unclassified_f__Eggerthellaceae	0	0	0	2.3e-05	0	1.2e-05	0.000999
g__Formosa	7.6e-05	0	2.5e-05	0	0	0	0.000999
g__norank_f__norank_o__RF39	6e-06	0	3e-06	0.001626	2e-06	0.000462	0.000999
g__Candidatus_Arthromitus	0	0	0	3.6e-05	0	3.2e-05	0.000999
g__Lachnospiraceae_UCG-001	0	0	0	4.3e-05	0	4.3e-05	0.000999
g__Rodentibacter	0	0	0	0.000225	0	0.00017	0.000999
g__unclassified_f__Anaerovoracaceae	0	0	0	4.4e-05	0	1.8e-05	0.001998
g__Christensenellaceae_R-7_group	8e-06	0	5e-06	0.000112	0	3.5e-05	0.008991
g__Lactobacillus	0.269835	0.030206	0.05496	0.125148	0.007067	0.026584	0.015984
g__norank_f__norank_o__Clostridia_UCG-014	0.008146	3.9e-05	0.001973	0.039557	0.002785	0.01669	0.015984
g__Intestinimonas	0.000183	0	7.1e-05	0.001327	3e-06	0.000558	0.017982
g__norank_f__Eggerthellaceae	0.000347	0	7.7e-05	0.001644	4e-06	0.000596	0.01998
g__Sphingomonas	0	0	0	2.4e-05	0	1.1e-05	0.023976
g__Alistipes	0.013362	5.2e-05	0.002283	0.031656	0.000574	0.007577	0.034965
g__norank_f__Eubacterium_coprostanoligenes_group	0.002686	4.1e-05	0.002033	7.4e-05	0	6.2e-05	0.036963
g__Marvinbryantia	0.000381	0	8.6e-05	0.0011	1e-06	0.000383	0.047952
g__norank_f__Oscillospiraceae	0.001342	2e-06	0.000474	0.008532	0.000224	0.004733	0.071928
g__norank_f__Caulobacteraceae	2e-06	0	2e-06	4.1e-05	0	3e-05	0.071928
g__Colidextribacter	0.001598	3e-06	0.000572	0.003594	6e-06	0.000803	0.075924
g__ASF356	1.2e-05	0	6e-06	0.000234	0	0.000189	0.076923
g__unclassified_c__Bacilli	0.000268	0	0.00013	5.3e-05	0	3.1e-05	0.078921
g__Olsenella	4e-06	0	4e-06	2.2e-05	0	1.2e-05	0.096903
g__Roseburia	0.000286	0	0.000124	0.002807	2.5e-05	0.001566	0.110889
g__Gordonibacter	0.000227	0	5.1e-05	0.000501	0	0.000168	0.111888
g__Anoxybacillus	8e-06	0	4e-06	6.3e-05	0	3.7e-05	0.111888
g__Family_XIII_UCG-001	4e-06	0	3e-06	1.9e-05	0	1.1e-05	0.111888
g__Romboutsia	0.103838	0.003827	0.019562	0.059069	0.003636	0.019068	0.114885
g__Clostridium_sensu_stricto_12	2e-06	0	2e-06	1.8e-05	0	1.1e-05	0.120879
g__Enterorhabdus	0.01093	3.9e-05	0.001966	0.026612	0.000881	0.009387	0.12987
g__Lactococcus	0.000643	0	0.000178	0.002376	1.3e-05	0.001136	0.141858
g__Anaerotruncus	0.000229	0	0.000114	0.003979	0.0001	0.003162	0.142857
g__unclassified_p__Firmicutes	0.000449	0	0.000151	0.000183	0	9.1e-05	0.142857
g__Harryflintia	9.4e-05	0	4.3e-05	0.000316	0	0.000138	0.145854
g__Streptococcus	0.007228	0.000105	0.00324	0.046546	0.005801	0.024085	0.152847
g__Globicatella	1.6e-05	0	6e-06	0.000163	0	9.5e-05	0.155844
g__Clostridium_sensu_stricto_1	0.00099	1e-06	0.000329	0.017853	0.00117	0.010817	0.158841
g__Eisenbergiella	0.0004	1e-06	0.000239	3.2e-05	0	2.4e-05	0.168831
g__GCA-900066575	0.000164	0	5.2e-05	0.00222	2.8e-05	0.001678	0.171828
g__Leuconostoc	0.000106	0	2.6e-05	0.000342	0	0.000154	0.176823
g__Oscillibacter	0.000705	1e-06	0.000287	0.003211	3.8e-05	0.001955	0.178821
g__Negativibacillus	0.000107	0	3.3e-05	0.000496	1e-06	0.000256	0.180819
g__Bradyrhizobium	3.8e-05	0	1.2e-05	0.000213	0	0.000144	0.180819
g__Burkholderia-Caballeronia-Paraburkholderia	1.9e-05	0	7e-06	0.000183	0	0.000139	0.180819
g__Butyricicoccus	8e-06	0	5e-06	7.3e-05	0	4.3e-05	0.181818
g__Odoribacter	0.007935	4e-05	0.002006	0.012932	7.4e-05	0.002724	0.183816
g__Stenotrophomonas	1.6e-05	0	7e-06	5.2e-05	0	2.4e-05	0.185814
g__Corynebacterium	7.5e-05	0	7.3e-05	0.000682	2e-06	0.000423	0.190809
g__Enterococcus	0.004959	5e-05	0.002245	0.01155	0.000179	0.004232	0.192807
g__UBA1819	0.000112	0	5.2e-05	0.000245	0	8.2e-05	0.194805
g__Parvibacter	0.002811	3e-06	0.000544	0.005377	3.4e-05	0.001854	0.198801
g__Eubacterium_xylanophilum_group	7e-06	0	7e-06	5.2e-05	0	3.7e-05	0.201798
g__Peptococcus	8e-06	0	3e-06	0.000117	0	7.5e-05	0.201798
g__UCG-005	7e-06	0	4e-06	2.3e-05	0	1.1e-05	0.208791
g__Bacteroides	0.013881	0.000128	0.003581	0.048029	0.006914	0.026294	0.222777
g__Lachnospiraceae_FCS020_group	5.4e-05	0	2.1e-05	0.000234	0	0.000155	0.22977
g__unclassified_f__Oscillospiraceae	0.000325	0	0.000127	0.001583	8e-06	0.000922	0.234765
g__Erysipelatoclostridium	0.006281	0.000177	0.004209	0.000512	0	0.000207	0.251748
g__Turicibacter	0.006523	0.000157	0.003962	0.017195	0.000712	0.008438	0.252747
g__Tuzzerella	0.000557	1e-06	0.000314	0.002289	2.2e-05	0.001476	0.25974
g__norank_f__Ruminococcaceae	0.001749	2e-06	0.000467	0.004383	4.1e-05	0.002034	0.262737
g__Monoglobus	0.001547	2e-06	0.000407	0.004302	4e-05	0.002008	0.263736
g__Anaerovorax	1e-05	0	4e-06	0.0001	0	7.8e-05	0.266733
g__norank_f__Christensenellaceae	0.000333	0	9.3e-05	0.000498	0	0.000115	0.270729
g__Parasutterella	6.9e-05	0	4.5e-05	0.000192	0	0.0001	0.273726
g__norank_f__UCG-010	0.000475	0	0.000209	0.000236	0	6.5e-05	0.302697
g__Rhodococcus	7e-05	0	2e-05	0.000362	1e-06	0.000238	0.308691
g__norank_f__Muribaculaceae	0.109776	0.009978	0.031589	0.158774	0.011069	0.033271	0.313686
g__Anaerofustis	0.000121	0	4.3e-05	0.000292	0	0.00015	0.323676
g__Staphylococcus	0.000231	0	0.000112	0.00051	1e-06	0.000231	0.324675
g__Mucispirillum	0.00339	9.2e-05	0.003026	0.008952	0.000192	0.004379	0.333666
g__UCG-009	7.9e-05	0	1.5e-05	0.000752	4e-06	0.000599	0.348651
g__unclassified_f__Ruminococcaceae	0.001079	1e-06	0.000273	0.001651	3e-06	0.00052	0.350649
g__Family_XIII_AD3011_group	0.00062	0	0.000199	0.001042	2e-06	0.000389	0.354645
g__Parabacteroides	0.001235	2e-06	0.000393	0.002185	7e-06	0.000848	0.362637
g__Ralstonia	3.1e-05	0	8e-06	0.000106	0	7.1e-05	0.378621
g__Bosea	1.3e-05	0	6e-06	2.6e-05	0	1.3e-05	0.37962
g__norank_f__norank_o__Clostridia_vadinBB60_group	0.000856	1e-06	0.000344	0.003137	4e-05	0.002	0.403596
g__Coriobacteriaceae_UCG-002	0.013781	0.000566	0.007521	0.055908	0.016129	0.040161	0.408591
g__Candidatus_Saccharimonas	0.04641	0.00297	0.017234	0.029116	0.000636	0.007977	0.410589
g__Desulfovibrio	0.067541	0.010323	0.03213	0.038001	0.001538	0.0124	0.41958
g__Muribaculum	0.000607	1e-06	0.000245	0.00035	0	0.000177	0.423576
g__unclassified_c__Clostridia	0.000134	0	2.9e-05	0.000172	0	3.3e-05	0.42957
g__Bifidobacterium	0.004363	0.000104	0.003225	0.000262	0	8.4e-05	0.442557
g__Lachnoclostridium	0.003692	2.4e-05	0.001538	0.002336	7e-06	0.000862	0.466533
g__Eubacterium_nodatum_group	0.000216	0	0.000107	0.000395	0	0.000193	0.481518
g__unclassified_o__Lactobacillales	7.7e-05	0	4.5e-05	0.000212	0	0.000137	0.482517
g__Acetatifactor	3.5e-05	0	1.3e-05	0.000144	0	0.000102	0.484515
g__Aerococcus	5.1e-05	0	4.8e-05	4e-06	0	4e-06	0.487512
g__Bilophila	0.000344	0	0.00011	0.001386	1.1e-05	0.001038	0.497502
g__Peptostreptococcus	1.5e-05	0	8e-06	3.6e-05	0	2.2e-05	0.5005
g__Escherichia-Shigella	0.041895	0.00757	0.027513	0.015227	0.001075	0.010368	0.502498
g__A2	0.000247	0	0.000214	0.000353	1e-06	0.000235	0.506494
g__norank_f__Peptococcaceae	0.000617	1e-06	0.000284	0.000931	1e-06	0.00034	0.515485
g__Faecalibaculum	0.137066	0.016364	0.040452	0.100698	0.026389	0.05137	0.587413
g__Acinetobacter	0.000512	1e-06	0.000316	0.004064	0.000139	0.003734	0.621379
g__Eubacterium_ventriosum_group	5.6e-05	0	2.4e-05	0.000205	0	0.000162	0.627373
g__NK4A214_group	0.000324	0	0.000161	0.000428	0	0.000148	0.646354
g__Blautia	0.007542	0.00021	0.004581	0.004351	5.4e-05	0.00233	0.656344
g__Helicobacter	0.002079	7e-06	0.000845	0.00259	6e-06	0.000793	0.665335
g__Lachnospiraceae_UCG-006	0.001991	4e-06	0.000629	0.001585	4e-06	0.000664	0.666334
g__norank_f__norank_o__Gastranaerophilales	0.001009	1e-06	0.000316	0.001224	2e-06	0.000471	0.696304
g__Akkermansia	0.01367	0.001121	0.010586	0.006652	0.000184	0.004288	0.707293
g__norank_f__Flavobacteriaceae	4e-05	0	1.6e-05	3.4e-05	0	1.3e-05	0.749251
g__norank_f__Erysipelotrichaceae	0.001667	1.7e-05	0.001303	0.002233	9e-06	0.000967	0.766234
g__Lachnospiraceae_NK4A136_group	0.004612	7.9e-05	0.002812	0.005326	6.8e-05	0.002613	0.834166
g__unclassified_f__Lachnospiraceae	0.020711	0.000698	0.008356	0.022773	0.000524	0.007237	0.859141
g__Rikenella	0.01748	0.000104	0.003228	0.018546	0.000209	0.004575	0.863137
g__unclassified_f__Peptostreptococcaceae	0.000284	0	0.000107	0.000263	0	0.000134	0.887113
g__norank_f__Lachnospiraceae	0.01096	0.00026	0.005095	0.012102	0.000363	0.006029	0.889111
g__norank_f__norank_o__norank_c__Clostridia	0.000166	0	8.1e-05	0.000158	0	8.9e-05	0.919081
g__Enterobacter	0.009324	0.000867	0.009309	0.000521	1e-06	0.000378	0.941059
g__Candidatus_Soleaferrea	5.7e-05	0	3.6e-05	5.2e-05	0	1.5e-05	0.955045
g__Eubacterium_brachy_group	0.000172	0	4e-05	0.000173	0	3.6e-05	0.983017
g__unclassified_o__Bacteroidales	0.000212	0	0.000119	0.000213	0	0.000113	0.995005
g__Actinomyces	0	0	0	5e-06	0	5e-06	1
g__Microbacterium	4e-06	0	3e-06	1.8e-05	0	1.1e-05	1
g__Arthrobacter	2e-06	0	2e-06	1e-05	0	4e-06	1
g__Kocuria	2e-06	0	2e-06	8e-06	0	5e-06	1
g__Rothia	0	0	0	6e-06	0	4e-06	1
g__Nocardioides	4e-06	0	3e-06	1.9e-05	0	9e-06	1
g__Alloprevotella	4e-06	0	3e-06	0	0	0	1
g__unclassified_f__Rikenellaceae	2e-06	0	2e-06	2e-06	0	2e-06	1
g__Cloacibacterium	0	0	0	9e-06	0	9e-06	1
g__Wolinella	0	0	0	1.3e-05	0	1.3e-05	1
g__Exiguobacterium	2e-06	0	2e-06	4e-06	0	4e-06	1
g__Atopococcus	0	0	0	8e-06	0	4e-06	1
g__Weissella	2e-06	0	2e-06	8e-06	0	7e-06	1
g__Macrococcus	0	0	0	1.7e-05	0	9e-06	1
g__Clostridium_sensu_stricto_18	2e-06	0	2e-06	6e-06	0	3e-06	1
g__norank_f__Eubacteriaceae	0	0	0	7e-06	0	5e-06	1
g__Lachnospiraceae_UCG-010	0	0	0	1.2e-05	0	8e-06	1
g__norank_f__norank_o__Oscillospirales	1.4e-05	0	4e-06	8e-06	0	5e-06	1
g__unclassified_o__Oscillospirales	0	0	0	1.1e-05	0	9e-06	1
g__Anaerosalibacter	0	0	0	4e-06	0	4e-06	1
g__Peptoniphilus	0	0	0	4e-06	0	3e-06	1
g__Brevundimonas	4e-06	0	3e-06	5e-06	0	5e-06	1
g__norank_f__Rhizobiales_Incertae_Sedis	0	0	0	3e-06	0	3e-06	1
g__Paracoccus	4e-06	0	3e-06	4e-06	0	3e-06	1
g__norank_f__Rhodobacteraceae	6e-06	0	3e-06	0	0	0	1
g__norank_f__norank_o__Rhodospirillales	0	0	0	9e-06	0	8e-06	1
g__Sphingobium	6e-06	0	4e-06	6e-06	0	3e-06	1
g__MM2	2e-06	0	2e-06	6e-06	0	4e-06	1
